# Supplementary material
Source: publisher figshare collection journal article supplement (https://karger.figshare.com/ndownloader/files/8718238)
Supplement: Supplementary file 1 [file 8718238]

## Supplementary Materials

### Title: Characterization of kidney and skeleton phenotypes of mice double-heterozygous for *Foxc1* and *Foxc2*

**Authors:** Masaru Motojima<sup>Ph.D.</sup><sup>1</sup>, Sho Tanimoto<sup>2</sup>, Masato Otsuka<sup>Ph.D.</sup><sup>2</sup>, Taiji Matsusaka M.D.,  
Ph.D.<sup>2</sup>, Tsutomu Kume Ph.D.<sup>3</sup>, and Koichiro Abe Ph.D.<sup>2</sup>

<sup>1</sup>Department of Clinical Pharmacology, <sup>2</sup>Department of Molecular Life Science, Institute of Medical Science, Tokai University School of Medicine, Isehara, Kanagawa 259-1193, Japan.

<sup>3</sup>Feinberg Cardiovascular Research Institute, Feinberg School of Medicine, Northwestern University, Chicago, Illinois 60611, USA.

**Journal:** Cells Tissues Organs

## Supplementary Figures

Figure S1. Expression of BMP4

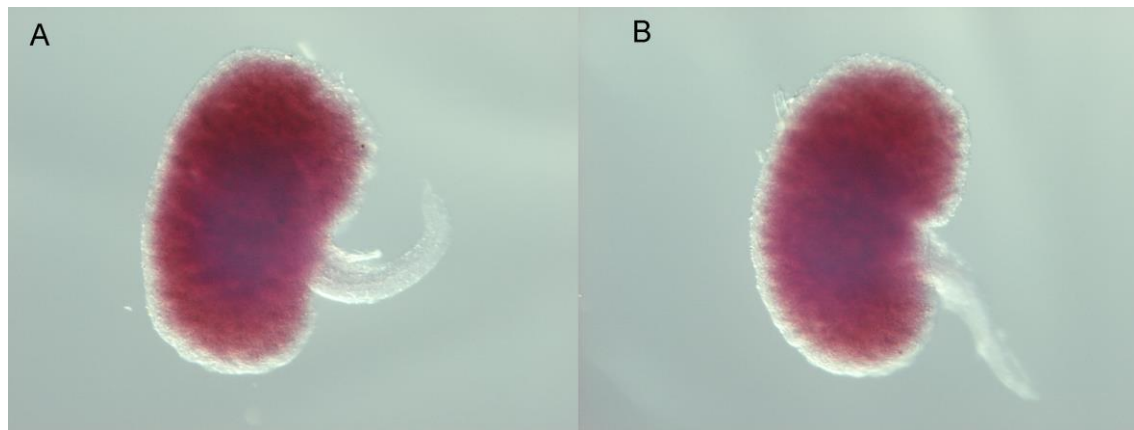

Expression of BMP4 mRNA in E15.5 kidneys was detected by *in situ* hybridization. Expression pattern of BMP4 in kidneys of double heterozygotes (B) is similar to that in kidneys of wild type mice (A).

Figure S2. Development of proximal tubules

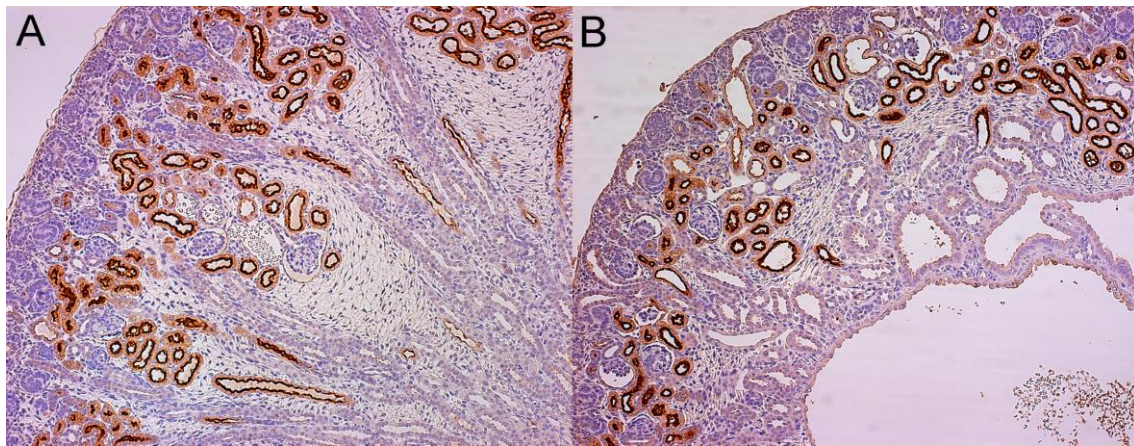

Development of proximal tubules in kidneys of P0 mice was examined by megalin immunostaining. Development of proximal tubules is not affected in kidneys of double heterozygotes. Ectopically formed kidney of a double heterozygote with hydronephrosis and glomerular cysts (B) is compared with a kidney of its littermate wild type mouse (A).

### Supplemental Methods

Wholemount kidney in situ hybridization was performed according to a method described in the Gudmap protocols [McMahon group, <http://www.gudmap.org/Research/Protocols/index.html>] using a BMP4 probe kindly provided by Dr. Miyazaki[Ueda et al., 2008].

Megaline immunostaining was performed as described previously [Komaki et al, CTO 2013].
